# Supplementary material for: A Study on the Pharmacokinetic Bioequivalence of Oral Tablet Formulations of Riluzole Among Healthy Volunteers Utilizing HPLC-MS/MS
Source: Research Square preprint supplement (doi:10.21203/rs.3.rs-5696871/v1), 2025-04-07
Supplement: Supplementary file 1 [file 113dcab8ee90fa2b38d2a730.docx]

**Supplementary material**

**Supplementary material 1 The molecular structure of riluzole**


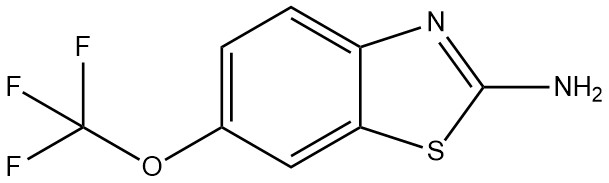


**Supplementary material 2 The inclusion and exclusion criteria of the subjects**

Inclusion criteria: ( To be included, all of the following criteria must be met)

1. Healthy Chinese subjects, aged 18 and above, including both males and females;
2. Male subjects must have a weight of at least 50 kg, while female subjects must weigh a minimum of 45 kg. Additionally, the body mass index (BMI) of all subjects must fall within the range of 19.0 to 26.0 kg/m2, inclusive of the boundary values;
3. The subjects had a comprehensive understanding of the trial's purpose, nature, methodology, and potential adverse reactions. They voluntarily signed the informed consent form and demonstrated the ability to successfully complete the study in alignment with the trial protocol's specified requirements;
4. The subjects communicated smoothly with investigators, demonstrating full comprehension and compliance with the study requirements.

Exclusion criteria: (Those who meet any of the following criteria will be excluded)

1. Those individuals who are known to have allergies to the test drug, its excipients, or possess an allergic constitution (reactive to two or more drugs, environmental factors, or food), as well as those prone to experiencing allergic symptoms like asthma, rash, and urticaria;
2. A history of chronic or severe illnesses pertaining to the cardiovascular, cerebrovascular, blood and lymphatic, respiratory (notably interstitial lung disease), immune, endocrine, dermatological, neurological, or mental health systems;
3. Please consider combining diseases or medical histories that could potentially impact the interpretation of drug absorption, distribution, metabolism, excretion, and safety data, as well as those that may decrease compliance. This includes, but is not limited to, the following conditions:
4. Complicated by inflammatory bowel disease, gastric ulcer, duodenal ulcer, gastrointestinal/rectal bleeding, persistent nausea, or other clinically significant gastrointestinal abnormalities;
5. Have a significant history of gastrointestinal surgeries, including gastrectomy, gastrointestinal anastomosis, bowel resection, cholecystectomy, etc., excluding surgeries for appendicitis and anal prolapse;
6. Evidence of liver disease or clinically significant impairment of liver function detected during screening;
7. Evidence of nephropathy or clinically significant impairment of renal function during screening;
8. Physical examination, assessment of vital signs, routine blood tests, routine urine analysis, blood biochemistry (comprising alanine aminotransferase, aspartate aminotransferase, total bilirubin, and glutamyltranspeptidase exceeding 1.2 times the normal range), coagulation function tests, pregnancy blood tests for female subjects, and clinically significant abnormal 12-lead ECG findings (as determined by the study physician);
9. The test results indicating abnormalities in hepatitis B virus surface antigen, hepatitis C virus antibody, Treponema pallidum specific antibody, or human immunodeficiency virus antigen/antibody are clinically significant.
10. Persons with difficulty swallowing;
11. Persons with positive drug abuse screening;
12. Those with a history of drug abuse within 6 months before screening;
13. Those who have used drugs within 3 months before screening;
14. Persons with positive alcohol breath test results;
15. Individuals who consumed over 14 units of alcohol weekly in the three months preceding the screening (where 1 unit of alcohol is approximately equivalent to 360 mL of beer, 45 mL of spirits with an alcohol content exceeding 40%, or 150 mL of wine), or those unable to consume alcohol during the assessment;
16. Those who smoked more than five cigarettes per day in the three months preceding the screening, or who were unable to smoke during the trial;
17. Those who drank excessive amounts (more than 8 cups a day, 1 cup =250 mL) of tea, coffee and/or caffeinated beverages per day within the 3 months prior to screening;
18. Cannot promise not to consume dragon fruit, mango, grapefruit, lime, carambola or food or drinks prepared therefrom, and not to consume chocolate and any caffeinated (such as coffee, strong tea, cola, etc.) from 3 days before admission to the Phase I ward in the first cycle to during the stay;
19. Those who donate blood or lose blood ≥400 mL within 3 months before screening (excluding blood loss during physiological periods in women) or those who donate blood during the planned trial and within 3 months after the end of the trial;
20. Those who have participated in other clinical trials within 3 months before screening and have used trial drugs or medical devices to intervene or who have failed the duplicate test;
21. Those who have undergone major surgical procedures within 3 months prior to screening, or plan to undergo surgery during the trial;
22. Those who have been vaccinated within 1 month before screening or plan to be vaccinated during the trial;
23. Those who have used any prescription drugs, over-the-counter drugs, vitamins, Chinese herbal medicines or health supplements within 2 weeks before screening;
24. Persons with difficulty in venipuncture, persons with a history of blood and needle sickness, and persons who cannot tolerate venipuncture;
25. Pregnant or nursing women;
26. Those who have special dietary requirements or are lactose intolerant (those who have had diarrhea after drinking milk) cannot adhere to the unified diet during the trial;
27. Male subjects (or their partners) or female subjects have a fertility plan or sperm and egg donation plan within 3 months from the screening date to the end of the trial, or are unwilling to adopt non-pharmacological contraceptive measures (pharmacological contraceptive measures include oral contraceptives, contraceptive needles, subcutaneous implantation methods, local contraceptives such as spermicides, etc.);
28. Those who develop acute diseases before the use of clinical trial drugs;
29. According to the investigator's judgment, those who are not suitable to participate in this trial.
